# Supplementary material
Source: publisher figshare collection journal article supplement (https://tandf.figshare.com/ndownloader/files/22738967)
Supplement: Supplementary file 1 [file 22738967]

**Appendix Table 1. Model inputs stratified by gestational age**

|  | **24 weeks** | | **25 weeks** | | **26 weeks** | | **27 weeks** | | **28 weeks** | | **29 weeks** | | **30 weeks** | | **31 weeks** | | **32 weeks** | | **Reference** |
| --- | --- | --- | --- | --- | --- | --- | --- | --- | --- | --- | --- | --- | --- | --- | --- | --- | --- | --- | --- |
| ACS**†** | No ACS | ACS | No ACS | ACS | No ACS | ACS | No ACS | ACS | No ACS | ACS | No ACS | ACS | No ACS | ACS | No ACS | ACS | No ACS |
| ***Infant Outcomes*** | | | | | | | | | | | | | | | | | | | |
| Respiratory distress syndrome | 0.25 | 0.37 | 0.24 | 0.35 | 0.22 | 0.34 | 0.15 | 0.23 | 0.11 | 0.16 | 0.08 | 0.12 | 0.05 | 0.08 | 0.04 | 0.06 | 0.03 | 0.04 | 1, 19, 20 |
| Intraventricular hemorrhage | 0.18 | 0.26 | 0.12 | 0.19 | 0.08 | 0.18 | 0.04 | 0.1 | 0.03 | 0.05 | 0.02 | 0.03 | 0.01 | 0.02 | 0.006 | 0.009 | 0.003 | 0.004 | 19, 20 |
| Neurodevelopmental delay, no IVH | 0.18 | 0.18 | 0.18 | 0.18 | 0.18 | 0.18 | 0.16 | 0.16 | 0.14 | 0.14 | 0.12 | 0.12 | 0.09 | 0.09 | 0.08 | 0.08 | 0.04 | 0.04 | 21, 22, 23, 24 |
| Neurodevelopmental delay, IVH | 0.57 | 0.57 | 0.57 | 0.57 | 0.57 | 0.57 | 0.53 | 0.53 | 0.48 | 0.48 | 0.45 | 0.45 | 0.37 | 0.37 | 0.33 | 0.33 | 0.21 | 0.21 | 21, 22, 23, 24, 25 |
| Death, no IVH | 0.36 | 0.52 | 0.2 | 0.30 | 0.12 | 0.17 | 0.06 | 0.11 | 0.03 | 0.07 | 0.02 | 0.04 | 0.01 | 0.02 | 0.005 | 0.013 | 0.003 | 0.006 | 19, 20 |
| Death, IVH | 0.76 | 0.86 | 0.59 | 0.71 | 0.43 | 0.54 | 0.28 | 0.41 | 0.16 | 0.29 | 0.09 | 0.18 | 0.06 | 0.10 | 0.03 | 0.07 | 0.02 | 0.03 | 19, 20, 25 |
| ***Percent of infants delivered per week*** | | | | | | | | | | | | | | | | | | | |
| <24 hours | 0.11 | | 0.12 | | 0.12 | | 0.13 | | 0.14 | | 0.15 | | 0.17 | | 0.19 | | 0.19 | | 17, 18 |
| 24 hours to 1 week | 0.25 | | 0.24 | | 0.24 | | 0.27 | | 0.29 | | 0.32 | | 0.39 | | 0.39 | | 0.44 | | 17, 18 |
| 1 to 2 weeks | 0.14 | | 0.14 | | 0.21 | | 0.23 | | 0.25 | | 0.25 | | 0.22 | | 0.22 | | 0.21 | | 17, 18 |
| 2 to 3 weeks | 0.16 | | 0.18 | | 0.18 | | 0.14 | | 0.12 | | 0.09 | | 0.08 | | 0.09 | | 0.09 | | 17, 18 |
| 3 to 4 weeks | 0.11 | | 0.10 | | 0.06 | | 0.06 | | 0.06 | | 0.07 | | 0.06 | | 0.06 | | 0.05 | | 17, 18 |

**†ACS: antenatal corticosteroids**

**Appendix Table 2. Maternal and infant outcomes in a theoretical cohort of 10,000 hospitalized women with a COVID-19 infection and preterm prelabor rupture of membranes at 24 to 32 weeks gestation**

|  | **24 weeks** | | **25 weeks** | | **26 weeks** | | **27 weeks** | | **28 weeks** | | **29 weeks** | | **30 weeks** | | **31 weeks** | | **32 weeks** | |
| --- | --- | --- | --- | --- | --- | --- | --- | --- | --- | --- | --- | --- | --- | --- | --- | --- | --- | --- |
| ACS**†** | No ACS | ACS | No ACS | ACS | No ACS | ACS | No ACS | ACS | No ACS | ACS | No ACS | ACS | No ACS | ACS | No ACS | ACS | No ACS |
| ***Maternal Outcomes*** | | | | | | | | | | | | | | | | | | |
| Intensive care unit admission | 2200 | 1500 | 2200 | 1500 | 2200 | 1500 | 2200 | 1500 | 2200 | 1500 | 2200 | 1500 | 2200 | 1500 | 2200 | 1500 | 2200 | 1500 |
| Death | 110 | 75 | 110 | 75 | 110 | 75 | 110 | 75 | 110 | 75 | 110 | 75 | 110 | 75 | 110 | 75 | 110 | 75 |
| ***Infant Outcomes*** | | | | | | | | | | | | | | | | | | |
| Respiratory distress syndrome | 2676 | 2993 | 2289 | 2564 | 1932 | 2213 | 1396 | 1616 | 1011 | 1173 | 735 | 869 | 526 | 628 | 406 | 489 | 281 | 343 |
| Intraventricular hemorrhage | 1499 | 1712 | 1067 | 1219 | 763 | 1004 | 441 | 597 | 275 | 342 | 163 | 216 | 101 | 148 | 52 | 64 | 26 | 31 |
| Neurodevelopmental delay | 1343 | 1257 | 1475 | 1421 | 1452 | 1442 | 1313 | 1312 | 1122 | 1118 | 940 | 943 | 732 | 740 | 556 | 556 | 294 | 293 |
| Death | 2993 | 3431 | 1800 | 2109 | 1120 | 1359 | 652 | 835 | 360 | 484 | 195 | 268 | 122 | 154 | 62 | 96 | 33 | 46 |
| ***Number of infants delivered per week*** | | | | | | | | | | | | | | | | | | |
| <24 hours | 1121 | 1125 | 1187 | 1191 | 1190 | 1191 | 1253 | 1258 | 1385 | 1390 | 1451 | 1456 | 1714 | 1720 | 1846 | 1853 | 1912 | 1919 |
| 24 hours to 1 week | 2550 | 2524 | 2484 | 2457 | 2484 | 2457 | 2813 | 2788 | 2978 | 2953 | 3307 | 3284 | 3934 | 3913 | 4000 | 3979 | 4429 | 4409 |
| 1 to 2 weeks | 1398 | 1403 | 1385 | 1390 | 2054 | 2061 | 2285 | 2293 | 2423 | 2432 | 2512 | 2521 | 2136 | 2144 | 2130 | 2138 | 2032 | 2040 |
| 2 to 3 weeks | 1531 | 1536 | 1739 | 1745 | 1803 | 1809 | 1366 | 1371 | 1149 | 1153 | 921 | 924 | 788 | 791 | 872 | 875 | 871 | 890 |
| 3 to 4 weeks | 1017 | 1020 | 976 | 980 | 575 | 577 | 600 | 602 | 624 | 626 | 643 | 645 | 615 | 617 | 628 | 630 | 542 | 544 |
| >4 weeks | 2383 | 2392 | 2230 | 2238 | 1898 | 1905 | 1683 | 1689 | 1141 | 1146 | 1166 | 1170 | 812 | 815 | 523 | 525 | 198 | 199 |

**†ACS: antenatal corticosteroids**
